# Long-lasting and responsive DNA/enzyme-based programs in serum-supplemented extracellular media

Jean-Christophe Galas,\* André Estevez-Torres,\* and Marc Van Der Hofstadt\*

1

*Sorbonne Université, CNRS, Institut de Biologie Paris-Seine (IBPS), Laboratoire Jean Perrin (LJP), F-75005, Paris, France*

E-mail: [jean-christophe.galas@upmc.fr](mailto:jean-christophe.galas@upmc.fr); [andre.estevez-torres@upmc.fr](mailto:andre.estevez-torres@upmc.fr); [marcvdhs@gmail.com](mailto:marcvdhs@gmail.com)

2

## Abstract

3

4

5

6

7

8

9

10

11

12

13

14

15

16

17

18

19

DNA molecular programs are emerging as promising pharmaceutical approaches due to their versatility for biomolecular sensing and actuation. However, the implementation of DNA programs has been mainly limited to serum-deprived *in vitro* assays due to the fast deterioration of the DNA reaction networks by the nucleases present in the serum. Here, we show that DNA/enzyme programs are functional in serum for 24h but are latter disrupted by nucleases that give rise to parasitic amplification. To overcome this, we implement 3-letter code networks that suppress autocatalytic parasites while still conserving the functionality of DNA/enzyme programs for at least 3 days in the presence of 10% serum. In addition, we define a new buffer that further increases the biocompatibility and conserves responsiveness to changes in molecular composition across time. Finally, we demonstrate how serum-supplemented extracellular DNA molecular programs remain responsive to molecular inputs in the presence of living cells, having responses 6-fold faster than cellular division rate and are sustainable for at least 3 cellular divisions. This demonstrates the possibility of implementing *in situ* biomolecular characterization tools for serum-demanding *in vitro* models. We foresee that the coupling of chemical reactivity to our DNA programs by aptamers or oligonucleotide conjugations will allow the implementation of extracellular synthetic biology

20 tools, which will offer new biomolecular pharmaceutical approaches and the emergence  
21 of complex and autonomous *in vitro* models.

## 22 **Keywords**

23 DNA molecular programs, Serum, endonuclease, responsive networks, living cells

24 In the last few decades, the programmability and reactivity of DNA has positioned the  
25 DNA nanotechnology field as a promising avenue for the development of biomolecular phar-  
26 maceutical approaches.<sup>1</sup> In particular, DNA molecular programming tools have been exten-  
27 sively used to create bioactuation systems for the delivery of cargoes<sup>2</sup> and for the modification  
28 of cellular composition,<sup>3</sup> as well as biosensing tools for cell sorting<sup>4</sup> and molecular detection.<sup>5</sup>  
29 For example, the specific amplification of nucleic acid sequences by polymerase-based DNA  
30 programs allows the detection of microRNA biomarkers down to attomolar concentrations  
31 with dynamic ranges up to 10 orders of magnitude.<sup>5</sup> In addition, the amplification of DNA  
32 also grants the possibility of implementing DNA molecular computations, which has already  
33 been nicely exploited to diagnose cancer profiles from human samples.<sup>6</sup> However, very few  
34 molecular programs work in direct contact with living cells.<sup>1</sup> In contrast, current imple-  
35 mentations favour the analysis of liquid biopsies within solutions that are not compatible  
36 with cellular growth<sup>7</sup> or else use compartments that separate the program and the living  
37 system.<sup>8-10</sup> As a result, these approaches limit the implementation of DNA pharmaceutical  
38 tools for *in vitro* studies.

39 In an effort to surpass this limitation, we recently demonstrated the embedding of a  
40 DNA/enzyme molecular program within the extracellular medium of an *in vitro* cell culture.<sup>3</sup>  
41 Notably, we showed how the programmable extracellular medium was capable of guiding  
42 cellular composition across time and space, opening the pathway towards the development  
43 of extracellular synthetic biology tools. Nevertheless, the absence of serum reduces the

44 biological significance of that study, since the myriad of bioactive substances provided by  
45 the animal serum has become an essential component for successful *in vitro* cell culture.<sup>11</sup>  
46 For this reason, the DNA nanotechnology field has recently focused on the stabilization of  
47 DNA nanostructures<sup>12</sup> and DNA circuits within serum-supplemented media.<sup>13</sup> However, to  
48 date, only Fern *et al.* have reported a solution for extending the functional life of DNA-only  
49 programs in the presence of serum components.<sup>14</sup> The main limitation emerges from the  
50 unwanted interactions of the serum components that alter or degrade the DNA molecules,  
51 which leads to the rapid loss of the designed networks. In particular, this low resilience has  
52 been mainly attributed to the degradation of the DNA by the presence of nucleases in the  
53 serum, which restrains any potential for long-term application of DNA programs.

54 To overcome the degradation of the DNA by the serum, two major approaches have been  
55 developed. Firstly, the nuclease activity can be impaired by using DNase inhibitors (such  
56 as actin) or by heat inactivating the serum.<sup>15</sup> Secondly, efforts have been focused on the  
57 protection of the synthetic DNA strands by the introduction of structural changes, either  
58 chemical<sup>16,17</sup> or morphological.<sup>14</sup> While the first approach is incompatible with nuclease-  
59 assisted DNA programs and lacks biological significance (as the heat inactivation denatures  
60 all proteins present in the serum), the second is not suitable for polymerase-based DNA  
61 programs as the *de novo* synthesized DNA cannot be protected *in situ*. For these reasons, to  
62 the best of our knowledge, long-lasting DNA/enzyme molecular programs have not yet been  
63 described in the presence of animal serum, limiting the potential of using DNA molecular  
64 programs in the presence of living cells for *in situ* biosensing and bioactuation.

65 Here, we demonstrated that a DNA/enzyme-based molecular program is functional in the  
66 presence of animal serum and living cells for at least three days. Firstly, we show that the  
67 existence of nucleases in the serum disrupt the polymerase-based DNA programs, since the  
68 emergence of non-programmed parasitic amplification is enhanced and overtakes the DNA  
69 program. To circumvent this, we restrained the undesired activity of serum nucleases by  
70 avoiding the creation of *de novo* double stranded DNA (dsDNA) through the use of 3-letter

71 code templates. The reformulated DNA programs were capable of responding to sequence-  
72 specific single stranded DNA (ssDNA) and triggering the *in situ* production of ssDNA up  
73 to 1  $\mu$ M for at least 49 h in the presence of 10% fetal bovine serum. Secondly, we show that  
74 such serum conditions are needed to conserve the phenotypic behaviour of *in vitro* human  
75 embryonic kidney cells. Finally, we demonstrate that serum-supplemented DNA/enzyme-  
76 based extracellular programs remain responsive in the presence of living cells, paving the way  
77 for the development of DNA-regulated extracellular synthetic biology systems that would  
78 complement traditional intracellular approaches to create complex and autonomous *in vitro*  
79 models.

## 80 Results

### 81 Serum disrupts the functionality of DNA/enzyme molecular pro- 82 grams

83 To assess the functionality and robustness of DNA/enzyme-based programs in serum, we  
84 performed an exponential amplification reaction (EXPAR) in the presence of fetal bovine  
85 serum (FBS). In particular, we focused on the polymerase, nickase, exonuclease dynamic  
86 network assembly toolbox (PEN DNA toolbox)<sup>18</sup> as it allows the assembly of elementary re-  
87 actions (Figure S8) into complex functional reaction networks.<sup>19,20</sup> Figure 1a exemplifies the  
88 behaviour of a PEN DNA autocatalyst, where ssDNA  $\mathbf{A}_1$  is amplified exponentially in the  
89 presence of template  $\mathbf{T}_1$  and the three enzymes cited above. The fluorescence of the interca-  
90 lator EvaGreen allows to follow, over time, the total concentration of double stranded DNA  
91 (dsDNA) in solution. This PEN amplification reaction is characterized by a sigmoidal curve,  
92 where an initial exponential phase is followed by a linear phase before reaching saturation.  
93 At saturation, the EvaGreen fluorescence reaches a plateau corresponding to a steady state  
94 of dsDNA concentration and due to the constant production and degradation of *de novo*  
95 DNA by the polymerase and exonuclease, respectively.<sup>18</sup> In a first series of experiments, we

106 tested the autocatalytic template  $\mathbf{T}_1$  in a buffer compatible both with PEN reactions and  
107 mammalian cell culture<sup>3</sup> (named *Kin* buffer due to its high enzyme kinetics, see SI Section  
108 3), for increasing concentrations of serum. In all conditions, we observed a decrease in the  
109 fluorescence intensity during the first 500 min (Figure 1b), reduction we account to an arti-  
110 fact due to the presence of 0.5x cell culture medium (Dulbecco's modified Eagle's medium,  
111 DMEM) in the buffer. However, the onset of the exponential amplification by the autocat-  
112 alytic  $\mathbf{T}_1$  template can still be clearly distinguished by the sigmoidal curve starting after  
113 500 min in the absence of FBS. Upon the introduction of 2.5% FBS, the DNA amplification  
114 dynamics were slowed down (loss in steepness of the linear region) and the dsDNA steady  
state regime was not persistent, since it was followed by a nonlinear signal increase after  
1800 min. We attribute both these deficiencies to the emergence of untemplated replication  
of DNA,<sup>21</sup> which gives rise to parasitic amplification networks that hijack the enzymes and  
energy source. As FBS concentration was further increased, the linear regime shortened and  
the nonlinear signal increase started earlier. At 10% FBS (standard cell culture concentra-  
tions) the initial exponential amplification regime of the synthetic  $\mathbf{T}_1$  template cannot be  
distinguished from the parasitic non-linear amplification. Denaturing polyacrylamide gel  
(PAGE) clearly demonstrated the production of copious DNA strands not related to the  
original amplification network (SI Section 2), and consequently the loss of the functionality  
of the DNA/enzyme molecular program.<sup>22</sup>

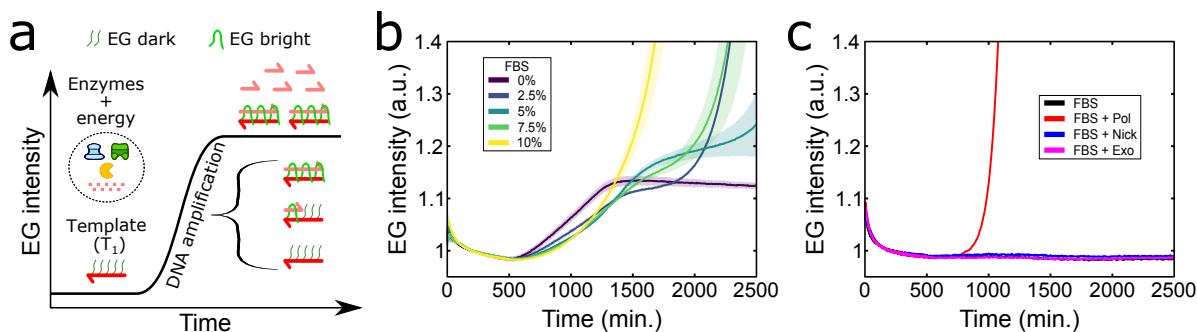

Figure 1: Serum promotes the emergence of parasitic amplification in the presence of polymerase-based DNA programs. (a) Scheme of the PEN DNA exponential amplification reaction depicting the nature and behaviour of the EvaGreen (EG) reporter, a fluorescent dsDNA intercalator, on the autocatalytic  $T_1$  template. Harpoon-ended arrows represent single stranded DNA (ssDNA). (b) EvaGreen fluorescence *versus* time for the  $T_1$  autocatalytic network at 37 °C in a concentration range of FBS. (c) EG fluorescence *versus* time for the incubation of 10% FBS with one of the three enzymes present in PEN reactions: polymerase (pol), Nb.BsmI nickase (nick) or exonuclease (exo). The shades in panel b correspond to one standard deviation of a triplicate experiment. Conditions panel b and c: *Kin* buffer with 0.1 mM dithiothreitol (DTT), in addition to 200 nM of autocatalytic  $T_1$  template for panel b.

115 Although the exact mechanism of parasitic amplification is still not well understood, it  
116 is known that it emerges from the *de novo* synthesis of DNA by polymerases<sup>23</sup> and by the  
117 presence of endonucleases that create tandem repeats<sup>24</sup> and quasi-palindromic sequences,<sup>21</sup>  
118 both containing the endonuclease recognition site. For instance, the polymerase and the  
119 nicking enzyme of the PEN reactions generate autocatalytic parasites in the presence of  
120 dNTPs.<sup>22</sup> To test if the observed parasites in the presence of serum (Figure 1b) were due  
121 to the PEN nicking enzyme or to an endonuclease present in the serum, we performed  
122 the following experiment. In a controlled experiment, we generated a PEN parasite in the  
123 presence of Nb.BsmI (the PEN nicking enzyme), and a second with the addition of 10%  
124 serum. After parasite had emerged, we incubated both conditions in the presence of BsmI,  
125 the corresponding restriction enzyme (SI Section 2). We observed that after 3.5 hours of BsmI  
126 incubation, the DNA smear characteristic of PEN parasites observed in denaturing PAGE  
127 had been strongly reduced (Figure S1).<sup>21</sup> In contrast, when we tested the degradability of  
128 parasites that had emerged in the presence of 10% FBS, we observed that, after 8 hours of  
129 BsmI incubation, the smear had only partially disappeared (Figure S2). We further tested

130 the potential of FBS to give rise *per se* or aided by PEN enzymes to the creation of parasite.  
131 We incubated 10% FBS in the absence or in the presence of one of the three enzymes  
132 present in PEN reactions and followed EvaGreen fluorescence for exponential amplification  
133 of *ab initio* dsDNA (Figure 1c). Results demonstrated that while 10% FBS was not capable  
134 of giving rise to parasite autonomously, parasite emerged only when polymerase was added to  
135 the FBS solution. In addition, we observed that the parasitic emergence time was inversely  
136 proportional to the FBS concentration (Figure S9). We infer that the FBS has endonuclease  
137 enzymes that, together with the polymerase and dNTPS used on PEN reactions, generates  
138 autocatalytic parasites that disrupts the DNA/enzyme programs.

### 139 **Impairing serum parasite emergence by using a 3-letter code**

140 We have recently demonstrated that the emergence of PEN parasites can be overcome by  
141 selecting a PEN enzyme whose recognition site only bears 3 of the 4 nucleotides per strand,  
142 coupled to a 3-letter code template.<sup>22</sup> As a result, in the absence of the fourth dNTP in the  
143 solution, *de novo* DNA synthesis by the polymerase cannot create *in situ* dsDNA that may be  
144 cleaved by the nicking enzyme, thus yielding a parasite (Figure S10).<sup>21,24</sup> Thus, by designing  
145 a PEN autocatalytic network with DNA templates containing only adenine, guanine and  
146 cytosine in their sequence, and removing adenosine triphosphate from the dNTPs solution  
147 (Figure 2a), one obtains a functional DNA circuit while avoiding the emergence of unwanted  
148 parasitic sequences.

149 To investigate if a 3-letter code approach can also impair the emergence of serum-  
150 promoted parasites, we first designed an autocatalytic template ( $\mathbf{T}_2$ ) that was based on  
151 the Nb.BssSI nickase, as all thymine bases are located in the same strand of the recognition  
152 site, and that worked at 37 °C. Figure 2b shows the amplification dynamics of template  $\mathbf{T}_2$  in  
153 the presence of 3 dNTPs and increasing concentrations of serum. The fluorescence intensity  
154 displayed a sigmoidal curve characteristic of PEN exponential amplification. Importantly,  
155 and contrary to 4-letter code templates (Figure 1b), the amplification dynamics were not

156 significantly affected, for up to 42 h, even in the presence of 10% FBS. We do observe a  
157 modest delay on the onset of the exponential amplification upon the addition of 10% FBS  
158 associated to a slower nickase kinetics (Figure S3). As expected, parasite emergence was still  
159 observed in the presence of 4 dNTPs (Figure S11).

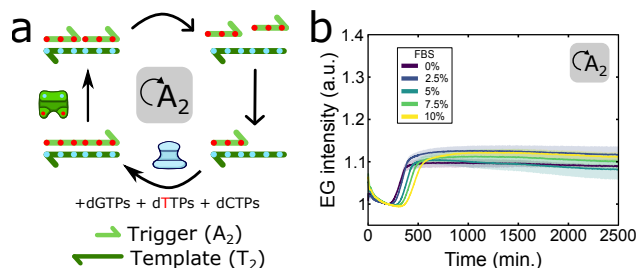

Figure 2: 3-letter code DNA networks preclude the emergence of autocatalytic parasites originating from endonucleases present in the FBS. (a) Scheme of the 3-letter code autocatalyst resistant to parasitic emergence in FBS due to the absence of dATPs in the solution. In this network, the dATPs (blue spots) are restricted to the synthetic  $T_2$  templates and the dTTPs (red spots) to the *de novo*  $A_2$  ssDNA synthesis. Harpoon-ended arrows represent ssDNAs. Irreversible and reversible reactions are indicated by solid and empty arrowheads, respectively. (b) EG fluorescence *versus* time for the  $T_2$  autocatalytic network with the Nb.BssSI nickase at 37 °C in a concentration range of FBS in the absence of dATPs. Note the absence of parasites compared to Figure 1b. The shades in panel b correspond to one standard deviation of a triplicate experiment. Conditions: *Kin* buffer with 0.1 mM DTT.

## 160 **PEN molecular programs remain responsive for at least 45 h**

161 *In vitro* cellular doubling time largely depends on cellular type and growth conditions, rang-  
162 ing from 10 h to few days.<sup>25</sup> For example, the doubling time for human cervix epithelial  
163 carcinoma cells (HeLa cell line) in our conditions was  $\sim 17.5$  h (Figure S12). In order to  
164 develop DNA extracellular programs that may interact with cells, one needs a DNA pro-  
165 gram that computes faster than cellular growth (*i.e.*  $< 15$  h) and that remains responsive  
166 for at least two cell cycles (*i.e.*  $> 40$  h). To introduce a fast and responsive behaviour into  
167 our DNA program, we took advantage of a repression module to implement a controllable  
168 bistable switch (Figure 3a).<sup>18</sup> In this network, we define the *ON* state as the result from the  
169 sustained exponential amplification of  $A_2$  by the autocatalytic reaction of template  $T_2$ , as  
170 it has been shown above. Contrary, in the *OFF* state, the presence of high concentrations of



171 the repressor strand ( $\mathbf{R}_2$ ) suppresses this autocatalytic reaction due to the combined elimi-  
172 nation of  $\mathbf{A}_2$  by the exonuclease and its conversion to waste ( $\mathbf{W}$ ) by  $\mathbf{R}_2$ . However, the *OFF*  
173 state can be reverted to the *ON* state by the addition of a DNA activator ( $\mathbf{R}_2^*$ ), comple-  
174 mentary to  $\mathbf{R}_2$ , that reactivates the exponential amplification of  $\mathbf{A}_2$ .<sup>3</sup> The program is thus  
175 *responsive* to the molecular stimulus of  $\mathbf{R}_2$ . Note that, due to the low dNTPs consumption  
176 rate of the system in the *OFF* state, we expect the DNA program to remain responsive for  
177 long periods of time.

178 To determine if the DNA program remained responsive in the presence of 10% FBS, we  
179 spiked the *OFF* state with 200 nM of  $\mathbf{R}_2^*$  at different time points (Figure 3b and Figure S6).  
180 Since the dithiothreitol (DTT) prevents the oxidation of the enzymes,<sup>26</sup> we hypothesized  
181 that increasing its concentration could help keeping the amplification onset time ( $\tau$ ) and the  
182 fluorescent amplitude of the response ( $\Delta I$ ) constant at longer times. We observed that the  
183 responsive time for up to 1868 min changed little for DTT concentrations ranging 0.2-0.5  
184 mM (Figure 3c). In contrast, at 2700 min, increasing DTT concentration from 0.2 up to 0.5  
185 mM made the response 26 % faster. Nevertheless, in all cases, the system was capable of  
186 responding at least 4.6-fold faster than HeLa cellular division rate and for at least 2.5 cell  
187 cycles.

188 The amplitude of the response (the steady-state signal of the fluorescently-labeled tem-  
189 plate, see SI Section 3) is also important for bioactuation purposes. Since we noticed that  
190 the  $\Delta I$  at twice the onset time ( $2\tau$ ) was decreasing with the injection time (Figure 3b and  
191 Figure S13), we evaluated the DNA concentration behaviour across time. To do so, we  
192 quantified the  $\mathbf{A}_2$  ssDNA available after a 49 h run for an experiment spiked at 0, 24 and  
193 40 h (Figure S14). When spiked at  $t = 0$  h, the DNA program produced respectively 0.8  
194  $\mu\text{M}$  and 1.1  $\mu\text{M}$  of  $\mathbf{A}_2$  in the presence of 0.2 and 0.5 mM DTT, which is  $\sim 5$ -fold greater  
195 than the template concentration (Figure 3d). We observed that these levels were similarly  
196 reached for experiments spiked after 24 h. Regarding 40 h spiked experiments, the produc-  
197 tion of  $\mathbf{A}_2$  could only reach  $53 \pm 1\%$  when 0.2 mM DTT was used. However, this production

198 increased up to  $89 \pm 15\%$  in the presence of 0.5 mM DTT, showing the great robustness  
 199 of PEN networks in the presence of serum. Furthermore, since the onset of the exponential  
 200 amplification is dependent on  $\mathbf{R}_2^*$  concentration (Figure S15), the designed DNA program  
 201 will also be capable of quantifying changes in molecular composition.

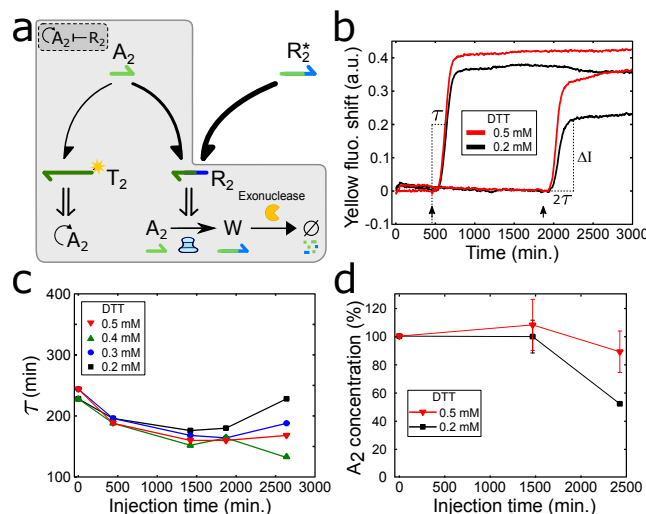

Figure 3: Long-lasting and responsive DNA programs in the presence of 10% FBS. (a) Scheme of the responsive DNA program. The combination of an autocatalytic node ( $\mathbf{T}_2$ ) with a repressor node ( $\mathbf{R}_2$ ) allows the creation of a bistable switch (grey enclosure), where the higher affinity of  $\mathbf{A}_2$  with  $\mathbf{R}_2$  compared with  $\mathbf{T}_2$  causes the extension of  $\mathbf{A}_2$  to a non functional ssDNA (waste  $\mathbf{W}$ ) and its degradation by the exonuclease. The addition of  $\mathbf{R}_2^*$  that binds to  $\mathbf{R}_2$  reduces the free concentration of the latter, promoting the exponential amplification of  $\mathbf{A}_2$  by  $\mathbf{T}_2$ . The thickness of half arrow-headed lines indicates DNA affinities. (b) Fluorescence shift from the fluorescently-labeled  $\mathbf{T}_2$  versus time for the responsive program triggered at different times with  $\mathbf{R}_2^*$  and for different [DTT] on the *Kin* buffer. The amplification onset time,  $\tau$ , and the fluorescent amplitude of the response at dsDNA steady state,  $\Delta I$ , are defined on the graph (see methods). (c)  $\tau$  versus the time at which  $\mathbf{R}_2^*$  was introduced into the solution (injection time) at different [DTT]. (d)  $\mathbf{A}_2$  relative concentrations at steady state with respect to the value obtained for an injection time at  $t = 0$  h, for different injection times and [DTT] (Figure S14). Data in panel c determined from panel b and Figure S6. Solid lines in panel c and d are guides to the eye. Error bars in panel d correspond to the standard deviation of a triplicate experiment. Conditions:  $[\mathbf{R}_2]_0 = 100$  nM. 200 nM of  $\mathbf{R}_2^*$  was added at the injection times (arrowheads in panel b).

## 202 Increasing the biocompatibility of the buffer

203 We have demonstrated that greater DTT concentrations improve the responsiveness of the  
 204 DNA program in the presence of serum. However, since high levels of [DTT] decrease cell

205 viability, as they transiently activate endoplasmic reticulum stress<sup>27</sup> and cause cell detach-  
206 ment,<sup>3</sup> we decided to further increase the biocompatibility of our buffer to mitigate cyto-  
207 toxicity (although the introduction of FBS already partially attenuates the adverse effect  
208 of DTT, Figure S16). To do so, we increased the concentration of the cell culture medium  
209 (from 0.5x to 0.89x), we removed non-critical PEN buffer components and lowered the con-  
210 centration of magnesium (SI Section 3) to create a new buffer that we named *Cell+* buffer.  
211 Interestingly, we observed that the chosen 3-letter code nickase (Nb.BssSI) was more robust  
212 to buffer modifications than the traditional Nb.BsmI nickase used for PEN reactions and  
213 that they were also functional in RPMI-1640, another standard cell culture media (Figure  
214 S7).

215 In contrast with the results shown above in the *Kin* buffer, we observed that the  $\tau$  and  
216  $\mathbf{A}_2$  concentrations at steady state in the *Cell+* buffer were strongly dependent on [DTT]  
217 and injection time (Figure 4 and Figure S13). In particular, we observed that at low DTT  
218 concentrations (0.2 mM)  $\tau$  values increased by 139% when the DNA program was activated  
219 after 45 h. However, at higher concentrations ( $>0.3$  mM) the DTT concentration had no  
220 further effect. Quantification of the available  $\mathbf{A}_2$  at steady state revealed that it decreased  
221 steadily at longer injection times. When the injection occurred at 24 h,  $\mathbf{A}_2$  was produced at  
222  $\sim 75\%$  of the steady state level when injected at  $t = 0$  h. Regarding the injection at 40 h,  
223  $\mathbf{A}_2$  dropped to  $26 \pm 5\%$  and  $60 \pm 6\%$  for the 0.2 and 0.3 mM of DTT, respectively. As the  
224 response ( $\tau$  and  $[\mathbf{A}_2]$ ) is not largely affected when the [DTT] is increased above 0.3 mM, we  
225 decided to use this concentration of DTT to have a compromise between functionality and  
226 biocompatibility for the new *Cell+* buffer.

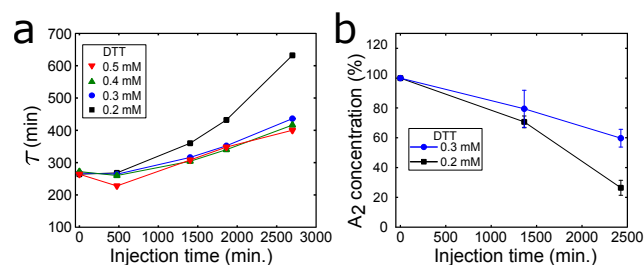

Figure 4: Responsiveness of the DNA program in the *Cell+* buffer. (a)  $\tau$  versus injection time of  $\mathbf{R}_2^*$  in *Cell+* buffer in a range of [DTT]. (b)  $A_2$  concentration for the injection of  $\mathbf{R}_2^*$  after 24 h and 40 h quantified from Figure S14. Data in panel a determined from Figure S6. Solid lines are guides to the eye. Error bars in panel b correspond to the standard deviation of a triplicate experiment. Conditions:  $[\mathbf{R}_2]_0 = 100$  nM. 200 nM of  $\mathbf{R}_2^*$  was added at the injection times.

227 Once that we have evaluated the performances of the DNA/enzyme program in the serum-  
228 supplemented *Kin* and *Cell+* buffers, it is now necessary to measure cellular viability in these  
229 buffers. To do so, HeLa cells were stained with propidium iodide and their fluorescence  
230 evaluated using flow cytometry at different culture times (Figure 5a and Figure S12). As  
231 expected, in the control condition the number of living cells increased with time. However,  
232 we noticed a 1.6-fold reduction on cellular growth rate after 48h that didn't occur in the  
233 absence of FBS (Figure S12), most likely indicating an impairment on cell growth due to the  
234 exposition to serum-supplemented media for long periods of time (e.g. high metabolism). To  
235 test the biocompatibility of the *Kin* buffer, we decided to use 0.5 mM DTT to conserve the  
236 fast and long-lasting responsiveness of the DNA program assessed in the previous section.  
237 Results revealed a significant reduction on cellular viability (down to 71%) and 3.6-fold  
238 lower cell number after 24h compared to the control, which we attribute to the toxicity and  
239 cellular detachment introduced by the high DTT concentration. On the other hand, the  
240 *Cell+* buffer at 0.3 mM DTT conserved high viability (above 93%) and similar cell number  
241 after 24h of incubation as the control. Although we found an average  $\sim 2$ -fold reduction in  
242 growth rate compared to the control, a  $\sim 2$ -fold increase in viable cell number after 48 h was  
243 achieved compared to previously reported experimental conditions in the absence of FBS  
244 (*Kin* buffer).<sup>3</sup>

245 To stress the importance of developing serum-compatible DNA/enzyme programs, we  
246 studied the growth of human embryonic kidney 293 cells (HEK 293 cell line), as their be-  
247 haviour (e.g. signalling pathways) is significantly affected by serum starvation.<sup>28</sup> We ob-  
248 served that in the absence of serum, HEK cells aggregated in standard cell culture medium,  
249 phenotype that was not appreciable when supplemented with 10% FBS (Figure 5b). We  
250 noted that the stretched morphology was still conserved for at least 48 h when the FBS was  
251 reduced down to 2.5% (Figure S17), opening the possibility to reduce the FBS concentration  
252 without perturbing cellular phenotype. When we evaluated the morphology and viability of  
253 HEK cells in the two DNA buffers, we noticed that, contrary to HeLa cells, HEK cells are  
254 less resilient to the presence of DTT (Figure S18), most likely due to their lower adhesion to  
255 surfaces. Nevertheless, HEK cells conserved high cellular viability and stretched morphology  
256 in the serum-supplemented *Cell+* buffer in contrast to what happened in the *Kin* buffer  
257 (Figure 5b and Figure S12).

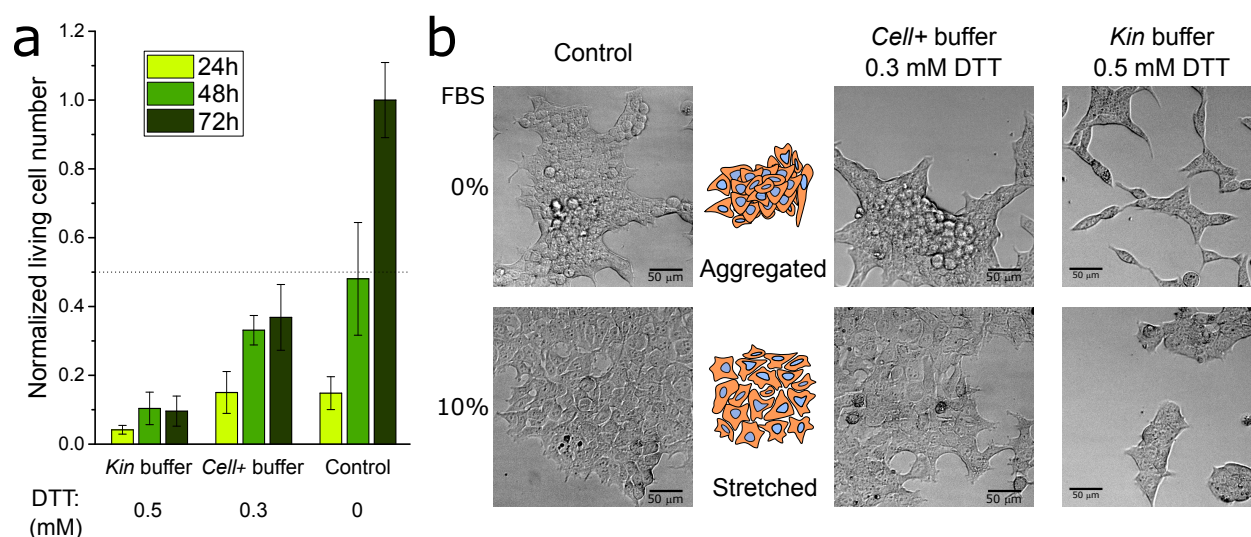

Figure 5: Evaluation of cell viability for the three buffers used in this study. (a) Normalized living cell number of HeLa cells determined by cellular staining with propidium iodide and flow cytometry for different incubation times and conditions in the presence of 10% FBS. Data determined from Figure S12. (b) Bright-field images demonstrating the morphology of HEK cells after 72 h of incubation in the absence or the presence of 10% FBS for the control growth medium, *Cell+* buffer and *Kin* buffer. Images obtained from the time-lapse of Figure S19.

## 258 Serum-supplemented DNA programs are functional in the presence 259 of cells

260 To verify that the DNA/enzyme program was still functional in the presence of living cells  
261 and 10% FBS, we first tested the bistable switch. To do so, we seeded the cells in a cell  
262 culture multiwell plate, and allowed them to adhere for 24 h before introducing the *Cell+*  
263 buffer containing the DNA program (Figure 6a). When the DNA program was set to be in  
264 the *ON* state ( $[\mathbf{R}_2]_0 = 0$  nM), the exponential amplification of DNA occurred within 2 h and  
265 reached a steady state after 23 h (Figure 6b). When the program started in the *OFF* state  
266 ( $[\mathbf{R}_2]_0 = 150$  nM), the amplification of DNA was suppressed for at least 71 h, showing the  
267 robustness of the *OFF* state in the presence of living cells. Quantification of the available  
268  $\mathbf{A}_2$  at steady state revealed that the same concentration of ssDNA was produced for the *ON*  
269 state in the absence (Figure 3d) and in the presence of cells (Figure 6c), and that no  $\mathbf{A}_2$  was  
270 produced in the *OFF* state.

271 To test the responsiveness of the DNA program in the presence of living cells, the *OFF*  
272 state was turned *ON* by the addition of 300 nM of  $\mathbf{R}_2^*$  after 24 h or 40 h. In both cases,  
273 we observed that the amplification of DNA was initiated within 3 h, which is  $\sim 6$ -fold faster  
274 than cellular growth rate, and reached a steady state after  $\sim 15$  h, where it remained until  
275 the end of the experiment. However, we noticed a  $\sim 50\%$  reduction in the dsDNA steady-  
276 state fluorescence compared to the *ON* state. The quantification of  $\mathbf{A}_2$  showed that the  
277 injections at 24 and 40 h produced 210 and 134 nM of  $\mathbf{A}_2$ , respectively. This is 2-3 times  
278 less than what was produced in the *ON* state but still remarkable and largely sufficient to  
279 perform downstream molecular computations. We hypothesize that this reduction is due  
280 to the presence of cells, either due to the cell debris and secretions that may interfere with  
281 the DNA/enzyme program, or due to a greater DNA uptake by cells due to the presence of  
282 FBS.<sup>29</sup> In addition, we contemplate that in early activated DNA programs, due to the high  
283 concentration of *de novo*  $\mathbf{A}_2$  ssDNA compared to the initial synthetic template  $\mathbf{T}_2$ , the core  
284 of the DNA program (*i.e.* the template) is significantly less affected by the presence of cells.

285 Similar results were obtained for the lesser biocompatible *Kin* buffer, although with a faster  
 286 response and higher  $A_2$  concentrations at steady state (Figures S20 and S21). Finally, clock  
 287 reactions controlling the onset time of the exponential amplification in a pre-encoded manner  
 288 were also functional in the presence of serum (Figure S21). These results demonstrate the  
 289 feasibility of programmable and responsive DNA/enzyme based molecular programs in the  
 290 presence of cells and 10% serum.

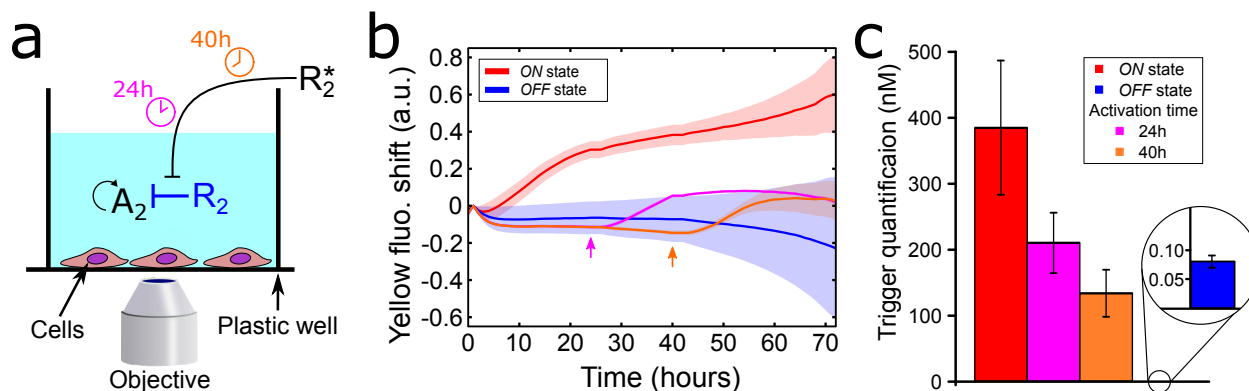

Figure 6: Long-lasting and responsive behaviours of serum-supplemented extracellular DNA programs in the presence of living cells. (a) Cartoon of the experimental setup (not to scale). The cells are cultured in the extracellular DNA program where the  $A_2$  autocatalyst is not suppressed (*ON* state) or permanently repressed (*OFF* state). In the later case, the *OFF* state can be reverted by the external addition of DNA activator  $R_2^*$  after 24 h (pink) or 40 h (orange). (b) Fluorescence shift of  $T_2$  versus time showing the production dynamics of  $A_2$  in the *Cell+* buffer in the presence of 10% FBS and HeLa cells. The curves show the unsuppressed *ON* state (red) and the repressed *OFF* state (blue) and its responsiveness by the addition of  $R_2^*$  at 24 h (pink) and 40 h (orange). Arrowheads indicate the addition time of DNA activator  $R_2^*$ . (c)  $A_2$  trigger concentrations after 71h of incubation of the DNA/enzyme-based molecular program in the presence of cells and 10% FBS. Data in panel c determined from Figure S20. Conditions: The *ON* and *OFF* states started with  $[R_2]_0 = 0$  nM and 150 nM, respectively. The DNA activator  $R_2^*$  was introduced at 300 nM.

## 291 Conclusions

292 In this paper, we demonstrate the co-existence of responsive DNA/enzyme-based programs  
 293 and living cells in the presence of 10% animal serum for at least 3 days, opening a route to  
 294 the implementation of *in situ* molecular characterization tools. We have shown that the long-  
 295 lasting programmability of polymerase-based DNA programs in the presence of serum is lost

in under one day due to the unwanted nuclease activity present in FBS, which gives rise to parasitic amplification that hijack the enzymes and energy source of the PEN DNA reaction networks. To overcome the emergence of parasites, we used DNA circuits that have been designed to only have 3 deoxynucleotides per strand instead of the traditional 4-letter code. By removing autocatalytic parasites, we could generate a DNA/enzyme program that was responsive for >45h in serum-supplemented buffers. Results revealed that the responsive behaviour to the activation of a bistable DNA switch was capable of producing and maintaining *in situ* up to 1  $\mu$ M of ssDNA for at least 49 h. In addition, cellular viability results revealed a  $\sim$ 2-fold increase in viable cell number of our serum-supplemented DNA programs in the new *Cell+* buffer in comparison to previous conditions in the absence of FBS.<sup>3</sup> Importantly, we have demonstrated that serum-supplemented buffers are capable of conserving the normal stretched phenotype of HEK cells, stressing the importance of developing serum-compatible molecular programs when adventuring for *in vitro* cell culture experiments. Finally, our cell culture results corroborate that serum-supplemented extracellular DNA molecular programs in the presence of living cells are functional, are pre-programmable, can respond to extracellular perturbations faster than cellular division rates and are sustainable for at least 3 cellular divisions (71 h).

The DNA network and buffer optimization shown here can be further extended to other DNA programs and other cell types with adequate modifications. For instance, due to the lower abundance of 3-letter code nucleases,<sup>30</sup> we hypothesize that the implementation of DNA-only networks based on 3 deoxynucleotides per strand can reduce the presence of restriction sites of serum nucleases that passively degrade the DNA circuits.<sup>14</sup> Regarding other cell types, we have shown that the DNA program is capable of working in two of the most standard cell culture media (DMEM and RPMI-1640), opening the possibility of its implementation to other cell types with sufficient adaptation. In particular, we stress the fact that we have shown functionality of the DNA program under the conventional use of 10% FBS for cell culture, but not all cells require 10% FBS to conserve growth and phenotype.



323 This grants the opportunity for reducing the concentration of FBS in the presence of the  
324 DNA program, which would imply the lower need of [DTT] for DNA responsiveness and  
325 hence the buffer would present even lower cytotoxicity for sensitive cell types (*e.g.* neurons).

326 With these outcomes, we now envision the implementation of extracellular DNA pro-  
327 grams capable of responding to changes in the molecular composition in the presence of  
328 living cells. In particular, the extracellular DNA programs will allow the *in situ* biomolec-  
329 ular recognition during *in vitro* cell culture, avoiding *ex situ* non-biocompatible amplifica-  
330 tion mechanisms that lack temporal and spatial resolution.<sup>5</sup> Furthermore, since the PEN  
331 DNA toolbox offers a large set of functional reaction networks, such as biochemical concen-  
332 tration patterns<sup>20,31,32</sup> and trigger-driven networks<sup>33,34</sup> with out-of-equilibrium properties,  
333 DNA molecular programs have potential to be advantageously used to create extracellular  
334 synthetic biology approaches. These approaches can be coupled to the abundant array of  
335 reactivity offered by oligonucleotides, either chemical<sup>35</sup> or structural,<sup>36</sup> to offer new biomolec-  
336 ular pharmaceutical tools. Likewise, communication pathways from the cells to the synthetic  
337 programs may be implemented by means of natural precursors (digestion, internalization)  
338 or synthetic approaches relying on biomolecular triggers,<sup>37</sup> which could be merged to the  
339 reactivity of oligonucleotides for the creation of complex and autonomous *in vitro* models.

## 340 Methods

341 The design of all DNA strands (Table S2) was done heuristically and assisted by Nupack,<sup>38</sup>  
342 and purchased from Integrated DNA Technologies, Inc (U.S.) or Biomers (Germany). Both  
343 nickases (Nb.BssSI and Nb.BsmI) and the Bst DNA polymerase large fragment were pur-  
344 chased from New England Biolabs. The *Thermus thermophilus* RecJ exonuclease was pro-  
345 duced in the lab following previous protocols.<sup>39</sup> Standard enzymatic concentrations used  
346 in this study were 8 U/mL polymerase, 100 U/mL Nb.BsmI and 31.25 nM exonuclease for  
347 Nb.BsmI experiments, and 6.4 U/mL polymerase, 20 U/mL Nb.BssSI and 50 nM exonuclease

348 for Nb.BssSI experiments.

349 The cell growth medium contained Dulbecco's modified Eagle's medium (DMEM F12,  
350 PAN Biotech P04-41150) supplemented with 1% Penicillin-Streptomycin. While *Kin* buffer  
351 was the previously developed biocompatible medium,<sup>3</sup> *Cell+* buffer was a further optimiza-  
352 tion to reduce toxicity without drastically losing DNA programmability (SI Section 3). Only  
353 *Kin* buffer and *Cell+* buffer contained dXTPs (where *X* could be 3 or N, see Table S1) at  
354 0.8 mM. Unless otherwise mentioned, all experiments were performed at 37 °C and 200 nM  
355 DNA Template. DNA sequences, buffer composition and further experimental procedures  
356 can be found in the Supplementary Information.

## 357 **PEN reactions in the absence of cells**

358 Experiments were done in 20  $\mu$ L solutions and the dynamics of the PEN reactions were  
359 exposed by fluorescent changes recorded by a Qiagen Rotor-Gene qPCR machine or a CFX96  
360 Touch Real-Time PCR Detection System (Bio-Rad). EvaGreen was used at 0.5x to detect  
361 parasite emergence. To remove artifacts due to the perturbation of the solution when the  
362 DNA activator  $\mathbf{R}_2^*$  was introduced and the opening of the thermal cycler machine, a home  
363 made Matlab (The Mathworks) script was used to mathematically equal the fluorescence  
364 before and after the perturbation. To calculate the fluorescence shift, the raw fluorescence  
365 intensity was corrected by an early time point and subtracted from 1, as done previously.<sup>20</sup>  
366 Both procedures are detailed in SI Section 1.2. For EvaGreen intensity values, the raw  
367 fluorescence intensity was only corrected by an early time point. To calculate the onset  
368 amplification time,  $\tau$ , the sigmoidal curve was fitted with a polynomial fit, followed by the  
369 derivative of the polynomial fit. The time point with the highest derivative value was chosen  
370 as the  $\tau$  value. The amplitude of the response ( $\Delta I$ ) was measured at the time point when  
371 the exponential amplification reached dsDNA steady state. We defined this  $\Delta I$  time point as  
372 the time point when twice the onset amplification time from the perturbation of the system  
373 has been attained.

## 374 **Cell culture handling and experiments**

375 Human cervix epitheloid carcinoma cells (HeLa cell line) and Human embryonic kidney 293  
376 cells (HEK 293 cell line) were grown at 37 °C and 5% CO<sub>2</sub>. To reduce the cellular shock upon  
377 removal of FBS, the cells were grown in two sequential steps of FBS (Dominique Dutscher:  
378 S1810-500) (10% and 5%) before maintaining cell culture growth at 2.5% FBS. Bright-  
379 field images for observing cellular morphology were obtained with a Zeiss Axio Observer Z1  
380 microscope with a 10X objective. When cells reached 80-90% confluence, they were detached  
381 with trypsin-EDTA (PAN Biotech: P10-019100) and diluted into fresh 2.5% FBS cell growth  
382 medium. For experiments, 800 cells were seeded in 384 cell well plates (ThermoFisher:  
383 142762) and allowed to adhere onto the surface for 24 h before replacing the medium with  
384 50 μL of the experimental condition.

385 To quantify cellular viability by fluorescenceactivated cell sorting (FACS), the experi-  
386 mental condition was replaced with 50 μL trypsin-EDTA (stock solution) and incubated for  
387 8 minutes prior inactivation with 50 μL of 10% FBS-supplemented cell growth medium. The  
388 cell suspension was mixed with 150 μL FACSFlow (Fisherscientific: 12756528) and 0.5 μL  
389 of propidium iodide (~15 mM, ThermoFisher: P3566). The propidium iodide was excited  
390 with a 488 nm argon ion laser equipped within the Becton-Dickinson flow cytometer (FAC-  
391 SCalibur), and the fluorescent emission recorded within the fluorescence channel FL-2 (band  
392 pass 585/42 nm). Cells were quantified for 3 min at a flow of 60 μL/min, and data was  
393 treated and analysed with a home-made Matlab routine. Cell count number was divided by  
394 the control growth medium to obtain the normalized living cell number.

## 395 **PEN reactions in the presence of cells**

396 Cells and PEN reactions were monitored using a fully automated Zeiss Axio Observer Z1  
397 epifluorescence microscope equipped with a ZEISS Colibri 7 LED light, YFP filter set, and a  
398 Hamamatsu ORCA-Flash4.0V3 inside a Zeiss incubation system to regulate temperature at  
399 37 °C, in the presence of high humidity and at 5% CO<sub>2</sub>. Fluorescence images were recorded

400 every 1 h with a 2.5X objective.

401 Images and data were treated as previously reported.<sup>3</sup> Briefly, an ImageJ / Fiji (NIH)  
402 routine was implemented to stack the time-lapse images of each well. Subsequently, a Matlab  
403 routine was used to create an intensity profile across time of each well, which was divided by  
404 an initial time point to correct from inhomogeneous illumination between wells. To correct  
405 for time-dependent artifacts (e.g evaporation), the profiles were normalized with a negative  
406 control (absence of enzymes,  $n = 2$ ). Lastly, fluorescent jumps and fluorescence shifts were  
407 calculated as described above.

## 408 Available $A_2$ ssDNA quantification

409 Samples were extracted from the condition of interest and diluted down to 0.025% or 0.075%  
410 into a fresh isothermal amplification reaction containing  $[T_2]_0 = 50$  nM. The amplification  
411 onset times ( $\tau$ ) were plotted within a trigger titration calibration curve for extrapolating  
412 the quantification of the available  $A_2$  ssDNA. To avoid perturbations from the FBS or the  
413 buffer sample, the fresh isothermal was performed with standard PEN DNA toolbox buffer  
414 that contains 3 mM DTT.<sup>20</sup>

## 415 Supporting information

416 The Supporting Information contains further experimental methodology, a discussion on  
417 parasitic emergence by FBS and details on the buffers, DNA sequences, 23 supporting figures.

## 418 Acknowledgements

419 We thank Stéphanie Bonneau and Ramón Eritja for supplying the HeLa cells, and Matthieu  
420 Morel the HEK 293 cells, Yannick Rondelez and Guillaume Ginés for insightful discussions,  
421 and Nelly Henry for the assistance with the FACS. We also thank the financial support from

422 the European Research Council (ERC) under the European's Union Horizon 2020 program  
423 (grant no. 770940, A.E.-T.), by the Ville de Paris Emergences program (Morphoart, A.E.-  
424 T.), by a Marie Skłodowska-Curie fellowship (grant no. 795580, M.vdH.) from the European  
425 Union's Horizon 2020 program, and by a PRESTIGE grant (grant no. 609102, M.vdH.) from  
426 the European Union's Seventh Framework Programme.

## 427 References

- 428 (1) Chen, Y.-J.; Groves, B.; Muscat, R. A.; Seelig, G. DNA nanotechnology from the test  
429 tube to the cell. *Nature Nanotechnology* **2015**, *10*, 748–760.
- 430 (2) Li, S. et al. A DNA nanorobot functions as a cancer therapeutic in response to a  
431 molecular trigger in vivo. *Nature Biotechnology* **2018**, *36*, 258–264.
- 432 (3) Van Der Hofstadt, M.; Galas, J.-C.; Estevez-Torres, A. Spatiotemporal Patterning of  
433 Living Cells with Extracellular DNA Programs. *ACS Nano* **2021**, *15*, 1741–1752.
- 434 (4) Song, T.; Shah, S.; Bui, H.; Garg, S.; Eshra, A.; Fu, D.; Yang, M.; Mokhtar, R.; Reif, J.  
435 Programming DNA-Based Biomolecular Reaction Networks on Cancer Cell Membranes.  
436 *Journal of the American Chemical Society* **2019**, *141*, 16539–16543.
- 437 (5) Gines, G.; Menezes, R.; Xiao, W.; Rondelez, Y.; Taly, V. Emerging isothermal amplifi-  
438 cation technologies for microRNA biosensing: Applications to liquid biopsies. *Molecular*  
439 *Aspects of Medicine* **2020**, *72*, 100832.
- 440 (6) Zhang, C.; Zhao, Y.; Xu, X.; Xu, R.; Li, H.; Teng, X.; Du, Y.; Miao, Y.; Lin, H.-c.;  
441 Han, D. Cancer diagnosis with DNA molecular computation. *Nature Nanotechnology*  
442 **2020**,
- 443 (7) Gines, G.; Menezes, R.; Nara, K.; Kirstetter, A.-S.; Taly, V.; Rondelez, Y. Isother-

- 444 mal digital detection of microRNAs using background-free molecular circuit. *Science*  
445 *Advances* **2020**, *6*, eaay5952.
- 446 (8) Chen, J.; Yin, W.; Ma, Y.; Yang, H.; Zhang, Y.; Xu, M.; Zheng, X.; Dai, Z.; Zou, X.  
447 Imaging of intracellular-specific microRNA in tumor cells by symmetric exponential  
448 amplification-assisted fluorescence in situ hybridization. *Chemical Communications*  
449 **2018**, *54*, 13981–13984.
- 450 (9) Joesaar, A.; Yang, S.; Bögels, B.; van der Linden, A.; Pieters, P.; Kumar, B. V. V. S. P.;  
451 Dalchau, N.; Phillips, A.; Mann, S.; de Greef, T. F. A. DNA-based communication in  
452 populations of synthetic protocells. *Nature Nanotechnology* **2019**, *14*, 369–378.
- 453 (10) Toparlak, D.; Zasso, J.; Bridi, S.; Serra, M. D.; MacChi, P.; Conti, L.; Baudet, M. L.;  
454 Mansy, S. S. Artificial cells drive neural differentiation. *Science Advances* **2020**, *6*,  
455 eabb4920.
- 456 (11) Brunner, D. Serum-free cell culture: the serum-free media interactive online database.  
457 *ALTEX* **2010**, *27*, 53–62.
- 458 (12) Chandrasekaran, A. R. Nuclease resistance of DNA nanostructures. *Nature Reviews*  
459 *Chemistry* **2021**, *5*, 225–239.
- 460 (13) Jeong, D.; Klocke, M.; Agarwal, S.; Kim, J.; Choi, S.; Franco, E.; Kim, J. Cell-Free  
461 Synthetic Biology Platform for Engineering Synthetic Biological Circuits and Systems.  
462 *Methods and Protocols* **2019**, *2*, 39.
- 463 (14) Fern, J.; Schulman, R. Design and Characterization of DNA Strand-Displacement Cir-  
464 cuits in Serum-Supplemented Cell Medium. *ACS Synthetic Biology* **2017**, *6*, 1774–1783.
- 465 (15) Hahn, J.; Wickham, S. F. J.; Shih, W. M.; Perrault, S. D. Addressing the Instability of  
466 DNA Nanostructures in Tissue Culture. *ACS Nano* **2014**, *8*, 8765–8775.

- 467 (16) Liu, Q.; Liu, G.; Wang, T.; Fu, J.; Li, R.; Song, L.; Wang, Z.-G.; Ding, B.; Chen, F.  
468 Enhanced Stability of DNA Nanostructures by Incorporation of Unnatural Base Pairs.  
469 *ChemPhysChem* **2017**, *18*, 2977–2980.
- 470 (17) Mallette, T. L.; Stojanovic, M. N.; Stefanovic, D.; Lakin, M. R. Robust Heterochiral  
471 Strand Displacement Using Leakless Translators. *ACS Synthetic Biology* **2020**, *9*, 1907–  
472 1910.
- 473 (18) Montagne, K.; Gines, G.; Fujii, T.; Rondelez, Y. Boosting functionality of synthetic  
474 DNA circuits with tailored deactivation. *Nature Communications* **2016**, *7*, 13474.
- 475 (19) Montagne, K.; Plasson, R.; Sakai, Y.; Fujii, T.; Rondelez, Y. Programming an in vitro  
476 DNA oscillator using a molecular networking strategy. *Molecular Systems Biology* **2011**,  
477 *7*, 466.
- 478 (20) Zadorin, A. S.; Rondelez, Y.; Gines, G.; Dilhas, V.; Urtel, G.; Zambrano, A.;  
479 Galas, J. C.; Estevez-Torres, A. Synthesis and materialization of a reaction-diffusion  
480 French flag pattern. *Nature Chemistry* **2017**, *9*, 990–996.
- 481 (21) Tan, E.; Erwin, B.; Dames, S.; Ferguson, T.; Buechel, M.; Irvine, B.; Voelkerding, K.;  
482 Niemz, A. Specific versus nonspecific isothermal DNA amplification through ther-  
483 mophilic polymerase and nicking enzyme activities. *Biochemistry* **2008**, *47*, 9987–9999.
- 484 (22) Urtel, G.; Van Der Hofstadt, M.; Galas, J.-C. J. C.; Estevez-Torres, A. REXPAR: An  
485 Isothermal Amplification Scheme That Is Robust to Autocatalytic Parasites. *Biochem-*  
486 *istry* **2019**, *58*, 2675–2681.
- 487 (23) Schachman, H.; Adler, J.; Radding, C. M.; Lehman, I.; Kornberg, A. Enzymatic Syn-  
488 thesis of Deoxyribonucleic Acid. *Journal of Biological Chemistry* **1960**, *235*, 3242–3249.
- 489 (24) Zyrina, N. V.; Zheleznaya, L. A.; Dvoretzky, E. V.; Vasiliev, V. D.; Chernov, A.;  
490 Matvienko, N. I. N.BspD6I DNA nickase strongly stimulates template-independent syn-

- thesis of non-palindromic repetitive DNA by Bst DNA polymerase. *Biological Chemistry* **2007**, *388*, 367–372.
- (25) Assanga, I. Cell growth curves for different cell lines and their relationship with biological activities. *International Journal of Biotechnology and Molecular Biology Research* **2013**, *4*, 60–70.
- (26) Baccouche, A.; Montagne, K.; Padirac, A.; Fujii, T.; Rondelez, Y. Dynamic DNA-toolbox reaction circuits: A walkthrough. *Methods* **2014**, *67*, 234–249.
- (27) XIANG, X.-Y.; YANG, X.-C.; SU, J.; KANG, J.-S.; WU, Y.; XUE, Y.-N.; DONG, Y.-T.; SUN, L.-K. Inhibition of autophagic flux by ROS promotes apoptosis during DTT-induced ER/oxidative stress in HeLa cells. *Oncology Reports* **2016**, *35*, 3471–3479.
- (28) Pirkmajer, S.; Chibalin, A. V. Serum starvation: caveat emptor. *American Journal of Physiology-Cell Physiology* **2011**, *301*, C272–C279.
- (29) Geary, R. S.; Norris, D.; Yu, R.; Bennett, C. F. Pharmacokinetics, biodistribution and cell uptake of antisense oligonucleotides. *Advanced Drug Delivery Reviews* **2015**, *87*, 46–51.
- (30) REBASE Enzymes, <http://rebase.neb.com/rebase/rebase.enz.html>.
- (31) Zadorin, A. S.; Rondelez, Y.; Galas, J.-C.; Estevez-Torres, A. Synthesis of Programmable Reaction-Diffusion Fronts Using DNA Catalyzers. *Physical Review Letters* **2015**, *114*, 068301.
- (32) Padirac, A.; Fujii, T.; Estévez-Torres, A.; Rondelez, Y. Spatial Waves in Synthetic Biochemical Networks. *Journal of the American Chemical Society* **2013**, *135*, 14586–14592.
- (33) Fujii, T.; Rondelez, Y. Predator - Prey molecular ecosystems. *ACS Nano* **2013**, *7*, 27–34.



- 515 (34) Gines, G.; Zadorin, A. S.; Galas, J.-C.; Fujii, T.; Estevez-Torres, A.; Rondelez, Y.  
516 Microscopic agents programmed by DNA circuits. *Nature Nanotechnology* **2017**, *12*,  
517 351–359.
- 518 (35) Freeman, R.; Stephanopoulos, N.; Álvarez, Z.; Lewis, J. A.; Sur, S.; Serrano, C. M.;  
519 Boekhoven, J.; Lee, S. S.; Stupp, S. I. Instructing cells with programmable peptide  
520 DNA hybrids. *Nature Communications* **2017**, *8*, 15982.
- 521 (36) Boshtam, M.; Asgary, S.; Kouhpayeh, S.; Shariati, L.; Khanahmad, H. Aptamers  
522 Against Pro- and Anti-Inflammatory Cytokines: A Review. *Inflammation* **2017**, *40*,  
523 340–349.
- 524 (37) Shenshin, V. A.; Lescanne, C.; Gines, G.; Rondelez, Y. A small-molecule chemical  
525 interface for molecular programs. *Nucleic Acids Research* **2021**, *49*, 7765–7774.
- 526 (38) Zadeh, J. N.; Steenberg, C. D.; Bois, J. S.; Wolfe, B. R.; Pierce, M. B.; Khan, A. R.;  
527 Dirks, R. M.; Pierce, N. A. NUPACK: Analysis and design of nucleic acid systems.  
528 *Journal of Computational Chemistry* **2011**, *32*, 170–173.
- 529 (39) Wakamatsu, T.; Kitamura, Y.; Kotera, Y.; Nakagawa, N.; Kuramitsu, S.; Masui, R.  
530 Structure of RecJ exonuclease defines its specificity for single-stranded DNA. *J Biol*  
531 *Chem* **2010**, *285*, 9762–9.
